# Supplementary material for: In vitro and in vivo brain-targeting chemo-photothermal therapy using graphene oxide conjugated with transferrin for Gliomas
Source: Springer Nature journal article supplement (doi:10.1007/s10103-016-1955-2), 2016-05-17
Supplement: MOESM1 [file 10130618]

Supporting information


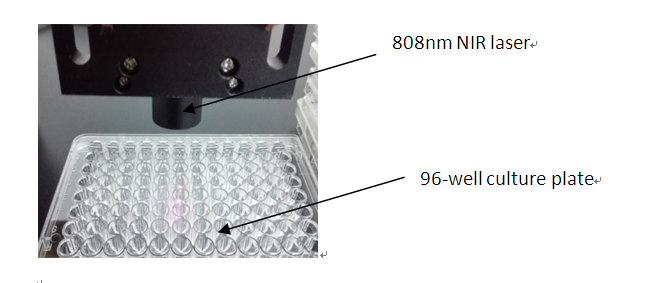


Fig. S1 C6 cells were seeded on 96-well culture plates, free Dox, TPG and TPGD were dissolved in culture medium. 808 nm NIR laser with 2.5 W/cm2 power density was directed towards every well of TPG and TPGD groups in 96-well culture plates one by one.


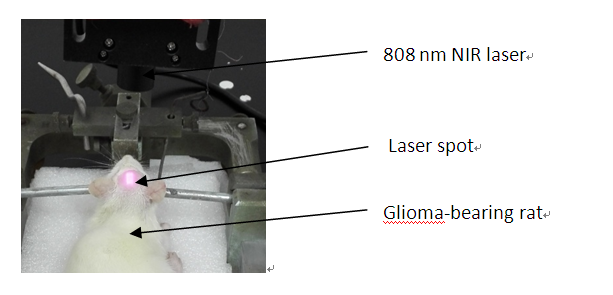


Fig. S2 Glioma-bearing rats were immobilized on a stereotactic instrument, 808 nm NIR laser with 2.5 W/cm2 power density was directed toward the head tumor site for 5 minutes.
